# Supplementary material for: Development of a Strategy for Enhancing the Biomass Growth and Lipid Accumulation of Chlorella sp. UJ-3 Using Magnetic Fe3O4 Nanoparticles
Source: MDPI journal article supplement (doi:10.3390/nano11112802), 2021-10-22
Supplement: s1 [file s1]

---

# Supplementary materials

## Development of a Strategy for Enhancing the Biomass Growth and Lipid Accumulation of *Chlorella sp.* UJ-3 Using Magnetic Fe<sub>3</sub>O<sub>4</sub> Nanoparticles

Feng Wang <sup>1,\*</sup>, Tingting Liu <sup>1</sup>, Wen Guan <sup>1</sup>, Ling Xu <sup>1</sup>, Shuhao Huo <sup>1</sup>, Anzou Ma <sup>2,\*</sup>, Guoqiang Zhuang <sup>2</sup> and Norman Terry <sup>3</sup>

<sup>1</sup> School of Food and Biological Engineering, Jiangsu University, Zhenjiang 212013, China; 2221918053@stmail.ujs.edu.cn (T.L.); ghwconan@163.com (W.G.); lxu@ujs.edu.cn (L.X.); huo@ujs.edu.cn (S.H.)

<sup>2</sup> Key Laboratory of Environmental Biotechnology, Research Center for Eco-Environmental Sciences, Chinese Academy of Sciences, Beijing 100085, China; gqzhuang@rcees.ac.cn

<sup>3</sup> Department of Plant and Microbial Biology, University of California, Berkeley, CA 94720, USA; nterry@berkeley.edu

\* Correspondence: fengwang@ujs.edu.cn (F.W.); azma@rcees.ac.cn (A.M.); Tel: +86-511-887-80201 (F.W.); +86-106-292-3562 (A.M.)

### 1. Methods

#### 1.1. Determination of Dissolved Fe in Culture Medium

The microalgae culture was centrifugated at 10,000 rpm for 10 min, and the supernatant was collected and dried by a lyophilizer (FreeZone®, LABCONCO, Waltham, MA USA). The dried powders were digested and then analyzed by using ICP-OES (Optima 5300DV, Pekin-Elmer, Greenville, SC, USA) according to the procedure described by John et al [1].

#### 1.2. Fe Recovery Rate of Fe<sub>3</sub>O<sub>4</sub> Nanoparticles

The microalgae culture was centrifugated at 10,000 rpm for 10 min, and the sediment was collected and washed with water for three times. The Fe<sub>3</sub>O<sub>4</sub> nanoparticles in sediments were dissolved by HCl and the microalgal cells were separated by micro-filtration [2]. The resulted filtrate was dried by a lyophilizer (FreeZone®, LABCONCO, Waltham, MA, USA) and the Fe content was analyzed by using ICP-OES. The Fe recovery rate of Fe<sub>3</sub>O<sub>4</sub> nanoparticles was calculated using the following equation:

$$\text{Fe recovery rate} = \frac{\text{Total Fe in the sediments}}{\text{Total Fe of the added Fe}_3\text{O}_4 \text{ NPs}} \times 100\%$$

The algal culture without treatment was mixed with the same dosage of Fe<sub>3</sub>O<sub>4</sub> nanoparticles for 5 min and then centrifugated at 10,000 rpm for 10 min. The sediment was collected and its Fe content was analyzed. The Fe recovery rate of Fe<sub>3</sub>O<sub>4</sub> nanoparticles was also calculated, which was used as the control without culture.

---

## 2. Results

### 2.1. Change of Dissolved Fe in the Culture Medium

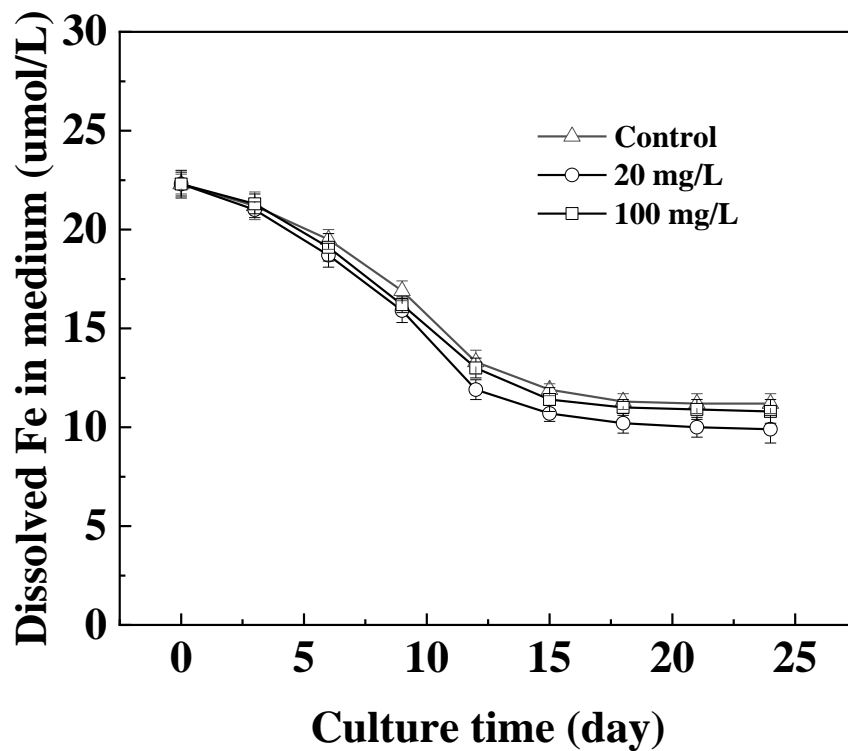

Figure S1. Change of dissolved Fe in the culture medium.

### 2.2. Fe Recovery Rate of $\text{Fe}_3\text{O}_4$ Nanoparticles

Table S1. Fe recovery rate of  $\text{Fe}_3\text{O}_4$  NPs after culture with the algal cells for 21 days.

| Concentration of $\text{Fe}_3\text{O}_4$ NPs (mg/L) | Fe recovery rate (%) |                         |
|-----------------------------------------------------|----------------------|-------------------------|
|                                                     | With culture         | Control without culture |
| 20                                                  | 96.3±3.8             | 96.7±3.5                |
| 100                                                 | 97.4±2.7             | 97.3±2.5                |

---

2.3. Change of Specific Growth Rate of *Chlorella* sp. UJ-3 cells during the Culture

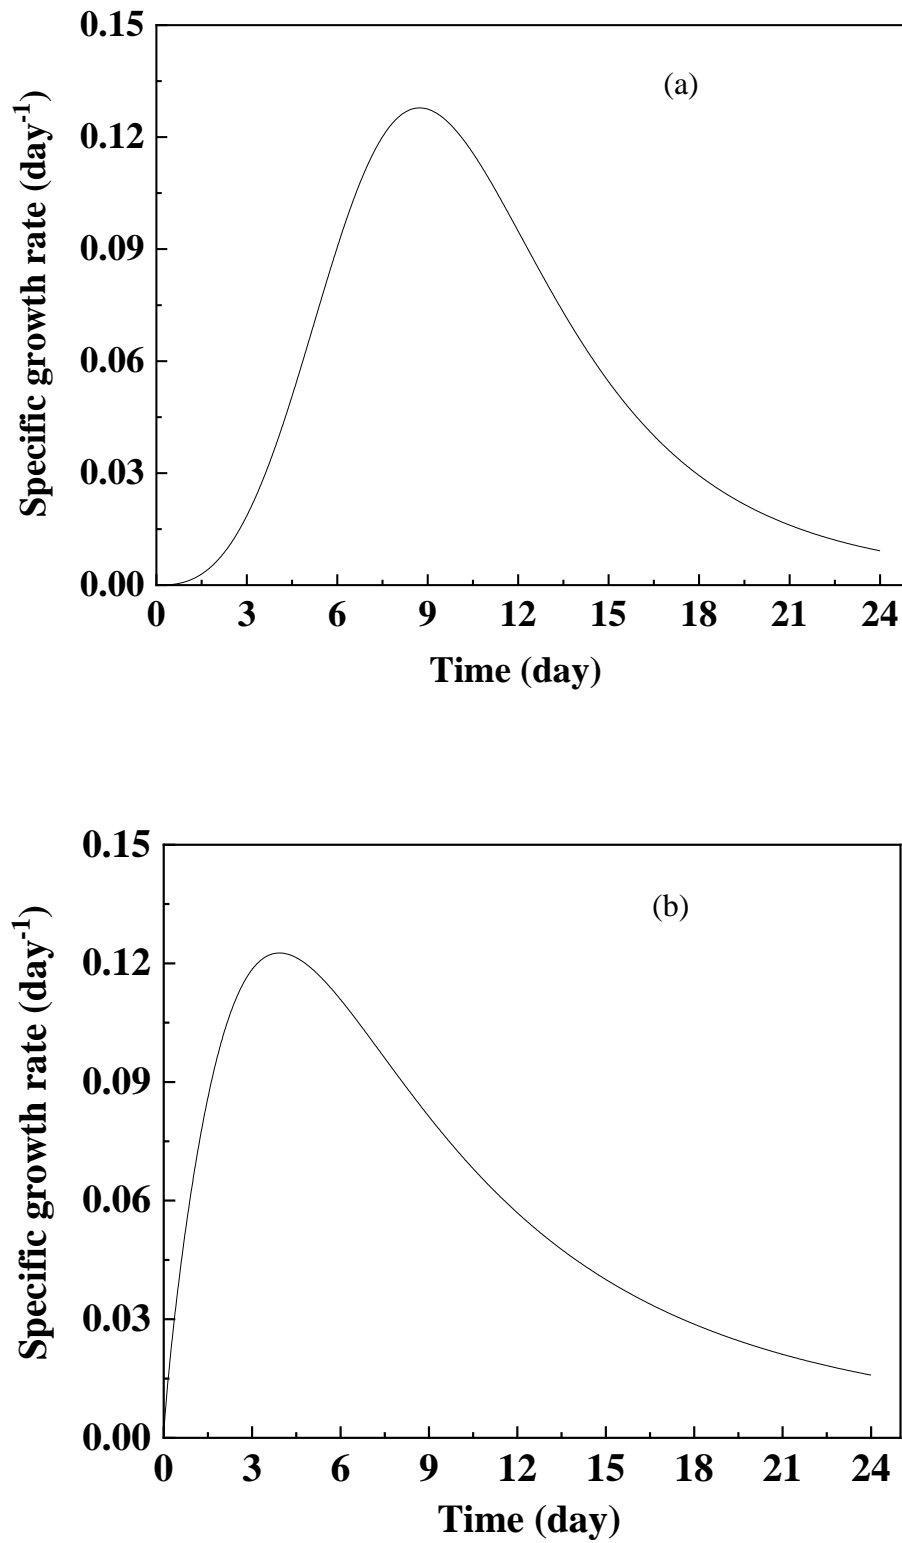

**Figure S2.** The specific growth rate of *Chlorella* sp. UJ-3 cells without treatment (a) and with the treatment at 100 mg/L of NPs (b).

#### 2.4. Fatty Acid Contents and Compositions of *Chlorella* sp. UJ-3 Exposed to Different Concentrations of Fe<sub>3</sub>O<sub>4</sub> NPs

**Table S2.** Fatty acid contents and compositions of *Chlorella* sp. UJ-3 exposed to different concentrations of Fe<sub>3</sub>O<sub>4</sub> NPs.

| Fatty acids | NPs concentration (mg/L) |                    |                  |                    |                  |                    |                  |                    |                  |                    |                  |                    |                  |                    |
|-------------|--------------------------|--------------------|------------------|--------------------|------------------|--------------------|------------------|--------------------|------------------|--------------------|------------------|--------------------|------------------|--------------------|
|             | 0                        |                    | 10               |                    | 30               |                    | 50               |                    | 80               |                    | 100              |                    | 200              |                    |
|             | Content (mg/gDW)         | Composition (%TFA) | Content (mg/gDW) | Composition (%TFA) | Content (mg/gDW) | Composition (%TFA) | Content (mg/gDW) | Composition (%TFA) | Content (mg/gDW) | Composition (%TFA) | Content (mg/gDW) | Composition (%TFA) | Content (mg/gDW) | Composition (%TFA) |
| C12:0       | 1.94±0.07                | 1.22±0.01          | 2.28±0.31        | 1.38±0.28          | 3.36±0.51        | 2.02±0.20          | 3.11±0.11        | 1.68±0.23          | 4.12±0.26        | 1.90±0.17          | 4.20±0.25        | 1.79±0.10          | 1.20±0.15        | 0.65±0.05          |
| C14:0       | 1.29±0.09                | 0.81±0.04          | 0.90±0.09        | 0.55±0.03          | 0.87±0.05        | 0.52±0.03          | 0.94±0.07        | 0.51±0.03          | 1.12±0.15        | 0.51±0.04          | 1.65±0.15        | 0.70±0.02          | 0.85±0.05        | 0.46±0.01          |
| C16:0       | 54.53±2.02               | 34.49±1.45         | 57.20±1.53       | 34.67±0.85         | 57.49±2.04       | 34.50±0.98         | 64.19±0.98       | 34.57±1.12         | 74.05±1.84       | 34.15±1.65         | 77.05±3.3        | 32.77±1.78         | 67.39±1.30       | 36.26±0.76         |
| C16:1       | 3.32±0.11                | 2.10±0.10          | 2.61±0.08        | 1.58±0.15          | 2.01±0.23        | 1.20±0.11          | 3.79±0.27        | 2.04±0.24          | 6.44±0.50        | 2.97±0.34          | 6.68±0.95        | 2.84±0.43          | 5.00±0.25        | 2.69±0.18          |
| C18:0       | 7.43±0.27                | 4.70±0.22          | 8.45±0.89        | 5.12±0.13          | 8.56±0.45        | 5.14±0.25          | 11.10±0.57       | 5.98±0.39          | 12.73±1.01       | 5.87±0.58          | 16.59±0.61       | 7.05±0.32          | 12.54±0.50       | 6.74±0.45          |
| C18:1       | 43.22±1.01               | 27.33±0.28         | 44.57±1.20       | 27.02±1.25         | 42.92±0.98       | 25.75±1.55         | 43.24±1.68       | 23.29±0.77         | 42.69±1.50       | 19.69±0.45         | 42.98±1.09       | 18.28±0.45         | 32.29±1.51       | 17.37±0.79         |
| C18:2       | 6.70±0.36                | 4.24±0.32          | 5.08±0.57        | 3.08±0.41          | 4.93±0.76        | 2.96±0.55          | 5.93±0.42        | 3.20±0.37          | 8.55±0.50        | 3.95±0.12          | 9.59±1.00        | 4.08±0.67          | 8.14±0.48        | 4.38±0.22          |
| C18:3n6     | 2.47±0.24                | 1.56±0.22          | 3.12±0.50        | 1.89±0.46          | 4.31±0.69        | 2.59±0.17          | 4.90±0.54        | 2.64±0.22          | 7.78±1.01        | 3.59±0.69          | 9.08±1.01        | 3.86±0.89          | 9.22±0.41        | 4.96±0.39          |
| C18:3n3     | 27.61±1.13               | 17.46±0.78         | 29.56±1.67       | 17.92±1.28         | 30.00±1.54       | 18.00±1.08         | 33.56±1.51       | 18.08±1.44         | 39.89±2.46       | 18.39±0.34         | 44.36±2.11       | 18.86±1.39         | 30.08±1.18       | 16.18±0.52         |
| C20:0       | 0.26±0.05                | 0.16±0.02          | 0.23±0.03        | 0.14±0.03          | 0.27±0.03        | 0.16±0.02          | 0.28±0.02        | 0.15±0.02          | 0.51±0.06        | 0.24±0.02          | 0.72±0.05        | 0.31±0.02          | 0.25±0.03        | 0.13±0.01          |
| C20:1       | 0.80±0.11                | 0.51±0.06          | 1.53±0.10        | 0.93±0.14          | 2.07±0.14        | 1.24±0.05          | 2.32±0.11        | 1.25±0.08          | 1.99±0.57        | 0.92±0.45          | 2.09±0.16        | 0.89±0.06          | 1.45±0.28        | 0.78±0.02          |
| C20:5       | 7.77±0.90                | 4.91±0.47          | 8.76±0.55        | 5.31±0.67          | 9.07±0.44        | 5.44±0.35          | 11.37±0.66       | 6.12±0.57          | 15.54±1.09       | 7.17±0.87          | 18.18±1.19       | 7.73±0.87          | 16.59±0.80       | 8.93±0.78          |
| C22:0       | 0.79±0.09                | 0.50±0.07          | 0.69±0.05        | 0.42±0.02          | 0.78±0.10        | 0.47±0.05          | 0.94±0.05        | 0.51±0.02          | 1.44±0.05        | 0.66±0.04          | 1.98±0.28        | 0.84±0.03          | 0.87±0.06        | 0.47±0.02          |
| Total       | 158.13±2.58              | 100.00             | 164.98±3.46      | 100.00             | 166.66±1.72      | 100.00             | 185.67±5.88      | 100.00             | 216.84±3.20      | 100.00             | 235.17±4.33      | 100.00             | 185.88±0.93      | 100.00             |

## 2.5. Fatty acid contents and compositions of *Chlorella* sp. UJ-3 exposed to low concentrations of Fe<sub>3</sub>O<sub>4</sub> NPs

**Table S3.** Fatty acid contents and compositions of *Chlorella* sp. UJ-3 exposed to low concentrations of Fe<sub>3</sub>O<sub>4</sub> NPs.

| Fatty acids | NPs concentration (mg/L) |                    |                  |                    |                  |                    |                  |                    |                  |                    |                  |                    |                  |                    |
|-------------|--------------------------|--------------------|------------------|--------------------|------------------|--------------------|------------------|--------------------|------------------|--------------------|------------------|--------------------|------------------|--------------------|
|             | 0                        |                    | 5                |                    | 10               |                    | 15               |                    | 20               |                    | 30               |                    | 40               |                    |
|             | Content (mg/gDW)         | Composition (%TFA) | Content (mg/gDW) | Composition (%TFA) | Content (mg/gDW) | Composition (%TFA) | Content (mg/gDW) | Composition (%TFA) | Content (mg/gDW) | Composition (%TFA) | Content (mg/gDW) | Composition (%TFA) | Content (mg/gDW) | Composition (%TFA) |
| C12:0       | 2.03±0.31                | 1.27±0.23          | 2.63±1.09        | 1.63±0.11          | 2.88±0.48        | 1.76±0.33          | 3.07±0.79        | 1.86±0.27          | 3.13±0.55        | 1.88±0.21          | 2.26±0.18        | 1.31±0.20          | 1.56±0.67        | 0.88±0.09          |
| C14:0       | 1.22±0.08                | 0.76±0.02          | 1.09±0.08        | 0.68±0.25          | 1.10±0.10        | 0.67±0.05          | 0.86±0.06        | 0.52±0.02          | 0.89±0.17        | 0.53±0.01          | 0.96±0.03        | 0.56±0.05          | 0.85±0.05        | 0.48±0.01          |
| C16:0       | 55.77±1.28               | 34.92±0.96         | 55.62±1.95       | 34.47±0.56         | 56.86±1.65       | 34.78±1.13         | 57.59±1.42       | 34.83±0.79         | 57.61±0.27       | 34.54±0.12         | 58.27±1.55       | 33.93±1.21         | 61.74±1.19       | 34.84±0.14         |
| C16:1       | 3.20±0.43                | 2.00±0.27          | 2.82±0.24        | 1.75±0.08          | 2.49±0.49        | 1.52±0.20          | 3.18±0.78        | 1.92±0.62          | 3.81±0.16        | 2.28±0.10          | 3.90±0.19        | 2.27±0.12          | 3.69±0.41        | 2.08±0.08          |
| C18:0       | 8.69±1.29                | 5.44±0.75          | 9.77±0.74        | 6.05±0.26          | 10.03±0.38       | 6.14±0.22          | 10.32±1.32       | 6.24±0.47          | 9.93±0.72        | 5.95±0.45          | 10.78±0.96       | 6.28±0.38          | 11.23±0.52       | 6.34±0.11          |
| C18:1       | 42.12±1.41               | 26.37±0.72         | 41.79±0.44       | 25.90±0.27         | 41.88±1.23       | 25.62±0.56         | 40.28±0.97       | 24.36±0.55         | 39.85±0.35       | 23.89±0.23         | 40.06±0.45       | 23.32±0.21         | 40.19±0.43       | 22.68±0.14         |
| C18:2       | 5.68±0.33                | 3.56±0.27          | 4.84±0.92        | 3.00±0.11          | 4.65±0.22        | 2.85±0.09          | 5.19±0.24        | 3.14±0.12          | 5.25±0.08        | 3.15±0.05          | 6.09±0.31        | 3.54±0.07          | 7.22±0.29        | 4.07±0.25          |
| C18:3n6     | 2.68±0.07                | 1.68±0.02          | 3.48±0.29        | 2.16±0.14          | 3.47±0.53        | 2.12±0.26          | 4.02±0.34        | 2.43±0.15          | 5.41±0.84        | 3.24±0.13          | 6.31±0.37        | 3.68±0.29          | 6.76±1.04        | 3.82±0.46          |
| C18:3n3     | 27.82±0.53               | 17.42±0.23         | 28.48±0.41       | 17.65±0.12         | 28.60±0.17       | 17.49±0.10         | 28.72±0.36       | 17.37±0.11         | 28.57±0.27       | 17.13±0.18         | 29.24±0.07       | 17.03±0.05         | 30.15±0.41       | 17.01±0.09         |
| C20:0       | 0.32±0.02                | 0.20±0.02          | 0.36±0.05        | 0.22±0.02          | 0.39±0.01        | 0.24±0.01          | 0.38±0.03        | 0.23±0.02          | 0.40±0.03        | 0.24±0.01          | 0.54±0.07        | 0.32±0.02          | 0.38±0.02        | 0.21±0.01          |
| C20:1       | 1.78±0.07                | 1.12±0.06          | 1.83±0.08        | 1.13±0.02          | 1.97±0.10        | 1.20±0.05          | 1.76±0.23        | 1.07±0.09          | 1.49±0.06        | 0.90±0.02          | 1.85±0.09        | 1.07±0.02          | 1.78±0.07        | 1.00±0.03          |
| C20:5       | 7.64±0.57                | 4.79±0.24          | 7.95±0.32        | 4.93±0.10          | 8.18±0.58        | 5.00±0.43          | 9.19±0.72        | 5.56±0.16          | 9.24±0.88        | 5.54±0.71          | 10.20±0.92       | 5.94±0.28          | 10.70±0.74       | 6.04±0.25          |
| C22:0       | 0.76±0.05                | 0.48±0.03          | 0.71±0.03        | 0.44±0.02          | 0.98±0.05        | 0.60±0.06          | 0.78±0.04        | 0.47±0.01          | 1.22±0.08        | 0.73±0.01          | 1.29±0.11        | 0.75±0.04          | 0.97±0.04        | 0.55±0.02          |
| Total       | 159.71±3.31              | 100.00             | 161.37±1.46      | 100.00             | 163.48±2.78      | 100.00             | 165.35±1.43      | 100.00             | 166.78±3.81      | 100.00             | 171.74±2.14      | 100.00             | 177.22±3.16      | 100.00             |

## 2.6. Fatty acid contents and compositions of *Chlorella* sp. UJ-3 exposed to high concentrations of Fe<sub>3</sub>O<sub>4</sub> NPs

**Table S4.** Fatty acid contents and compositions of *Chlorella* sp. UJ-3 exposed to high concentrations of Fe<sub>3</sub>O<sub>4</sub> NPs.

| Fatty acids | NPs concentration (mg/L) |                    |                  |                    |                  |                    |                  |                    |                  |                    |                  |                    |                  |                    |
|-------------|--------------------------|--------------------|------------------|--------------------|------------------|--------------------|------------------|--------------------|------------------|--------------------|------------------|--------------------|------------------|--------------------|
|             | 0                        |                    | 60               |                    | 80               |                    | 100              |                    | 120              |                    | 140              |                    | 160              |                    |
|             | Content (mg/gDW)         | Composition (%TFA) | Content (mg/gDW) | Composition (%TFA) | Content (mg/gDW) | Composition (%TFA) | Content (mg/gDW) | Composition (%TFA) | Content (mg/gDW) | Composition (%TFA) | Content (mg/gDW) | Composition (%TFA) | Content (mg/gDW) | Composition (%TFA) |
| C12:0       | 2.15±0.21                | 1.38±0.05          | 3.62±0.14        | 1.91±0.07          | 3.00±0.10        | 1.41±0.06          | 2.73±0.32        | 1.16±0.09          | 2.09±0.15        | 1.00±0.06          | 2.12±0.10        | 1.07±0.07          | 2.22±0.17        | 1.16±0.06          |
| C14:0       | 1.17±0.10                | 0.75±0.01          | 0.76±0.05        | 0.40±0.02          | 0.97±0.10        | 0.46±0.02          | 1.03±0.10        | 0.44±0.05          | 0.86±0.09        | 0.41±0.02          | 0.83±0.03        | 0.42±0.01          | 0.85±0.04        | 0.45±0.02          |
| C16:0       | 50.55±1.76               | 32.36±0.65         | 61.79±1.59       | 32.65±0.98         | 70.69±0.91       | 33.32±1.18         | 77.17±2.03       | 32.79±1.26         | 71.26±2.01       | 34.15±1.10         | 67.47±1.08       | 34.18±0.52         | 64.76±1.73       | 33.87±0.29         |
| C16:1       | 3.12±0.10                | 2.00±0.16          | 3.97±0.21        | 2.10±0.09          | 5.83±0.57        | 2.75±0.21          | 7.34±0.55        | 3.12±0.38          | 6.25±0.25        | 2.99±0.12          | 5.39±0.22        | 2.73±0.10          | 5.29±0.24        | 2.77±0.07          |
| C18:0       | 6.04±0.22                | 3.87±0.12          | 9.89±0.57        | 5.22±0.23          | 10.77±1.14       | 5.08±0.84          | 14.54±0.50       | 6.18±0.12          | 12.44±0.50       | 5.96±0.30          | 11.87±1.00       | 6.01±0.82          | 12.42±0.38       | 6.49±0.32          |
| C18:1       | 41.52±1.92               | 26.58±1.12         | 40.81±1.10       | 21.56±0.78         | 40.15±1.56       | 18.93±0.92         | 41.78±1.69       | 17.75±0.73         | 35.58±1.71       | 17.05±1.31         | 33.25±1.12       | 16.84±0.78         | 31.34±1.17       | 16.39±0.92         |
| C18:2       | 7.79±0.51                | 4.99±0.13          | 8.45±0.45        | 4.47±0.22          | 9.91±1.11        | 4.67±0.57          | 12.57±0.96       | 5.34±0.25          | 9.65±0.88        | 4.62±0.74          | 8.38±0.33        | 4.25±0.10          | 8.22±0.21        | 4.30±0.06          |
| C18:3n6     | 3.08±0.17                | 1.97±0.05          | 6.38±0.27        | 3.37±0.25          | 7.48±0.47        | 3.52±0.28          | 7.89±0.50        | 3.35±0.17          | 6.99±0.56        | 3.35±0.26          | 7.15±0.41        | 3.62±0.27          | 6.93±0.71        | 3.62±0.08          |
| C18:3n3     | 28.77±0.65               | 18.42±0.24         | 36.80±1.55       | 19.44±1.19         | 42.18±0.88       | 19.88±1.18         | 45.48±1.51       | 19.33±1.13         | 41.18±1.50       | 19.73±0.54         | 38.34±1.91       | 19.42±0.73         | 37.43±1.97       | 19.58±1.05         |
| C20:0       | 0.22±0.03                | 0.14±0.01          | 0.22±0.02        | 0.12±0.01          | 0.47±0.06        | 0.22±0.02          | 0.54±0.05        | 0.23±0.01          | 0.28±0.04        | 0.13±0.01          | 0.30±0.04        | 0.15±0.01          | 0.28±0.04        | 0.15±0.01          |
| C20:1       | 0.57±0.05                | 0.37±0.01          | 1.23±0.11        | 0.65±0.05          | 1.43±0.05        | 0.68±0.02          | 1.58±0.10        | 0.67±0.04          | 1.43±0.05        | 0.68±0.03          | 1.37±0.06        | 0.69±0.01          | 1.39±0.07        | 0.72±0.01          |
| C20:5       | 10.36±0.54               | 6.63±0.49          | 14.57±1.08       | 7.70±0.28          | 18.17±0.45       | 8.56±0.11          | 21.48±1.00       | 9.13±0.28          | 19.59±0.89       | 9.39±0.27          | 19.83±0.73       | 10.04±0.52         | 18.97±0.82       | 9.92±0.27          |
| C22:0       | 0.87±0.05                | 0.56±0.02          | 0.76±0.05        | 0.40±0.02          | 1.09±0.08        | 0.52±0.01          | 1.20±0.06        | 0.51±0.02          | 1.10±0.10        | 0.53±0.03          | 1.12±0.09        | 0.57±0.02          | 1.12±0.10        | 0.59±0.01          |
| Total       | 156.22±1.45              | 100.00             | 189.25±2.36      | 100.00             | 212.14±1.88      | 100.00             | 235.33±3.49      | 100.00             | 208.70±2.01      | 100.00             | 197.40±5.87      | 100.00             | 191.21±1.09      | 100.00             |

---

### 2.7. Effect of transition time on the combination strategy

**Table S5.** Effect of transition time on combination strategy with low-high concentration NPs treatment.

| Transition time | Biomass (g/L) | Lipid production (g/L) |
|-----------------|---------------|------------------------|
| Day 3           | 0.96±0.03     | 0.40±0.02              |
| Day 6           | 1.02±0.02     | 0.43±0.02              |
| Day 9           | 1.08±0.02     | 0.45±0.01              |
| Day 12          | 1.18±0.03     | 0.49±0.02              |
| Day 15          | 1.17±0.03     | 0.42±0.03              |

## Reference

- [1] John, K.M.M.; Enkhtaivan, G.; Lee, J.H.; Thiruvengadam, M.; Keum, Y.S.; Kim, D.H. Spectroscopic determination of metabolic and mineral changes of soya-chunk mediated by *Aspergillus sojae*. *Food Chemistry* **2015**, 170, 1-9.
- [2] Xu, L.; Guo, C.; Wang, F.; Zheng, S.; Liu, C.Z. A simple and rapid harvesting method for microalgae by in situ magnetic separation. *Bioresource Technology* **2011**, 102, 10047-10051.
-
